# Supplementary material for: Effects of NaCl Concentrations on Growth Patterns, Phenotypes Associated With Virulence, and Energy Metabolism in Escherichia coli BW25113
Source: PubMed Central journal article supplement (PMC8415458; doi:10.3389/fmicb.2021.705326), 2021-08-16
Supplement: Image_3.pdf [file Image_3.pdf]

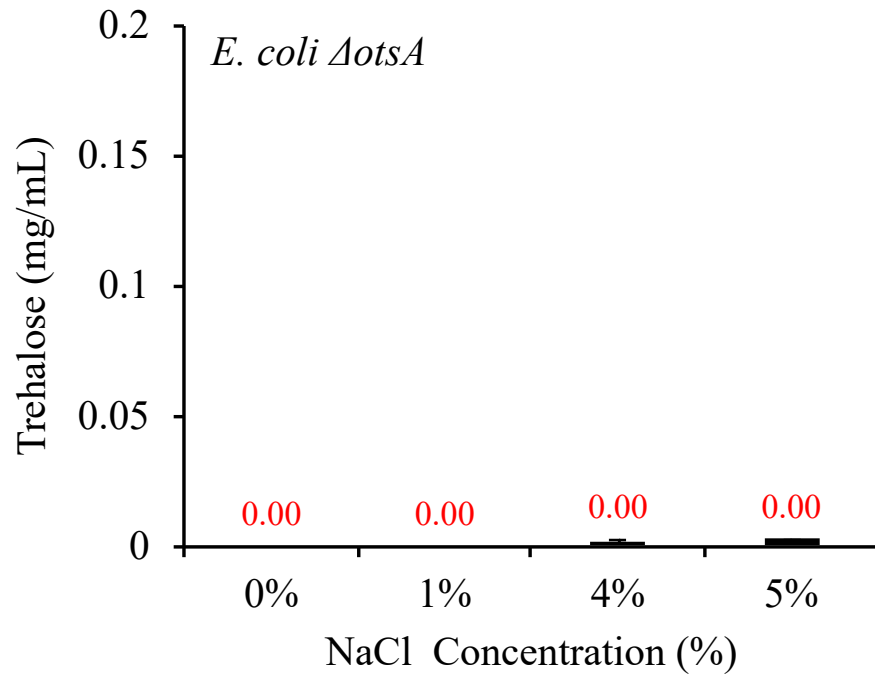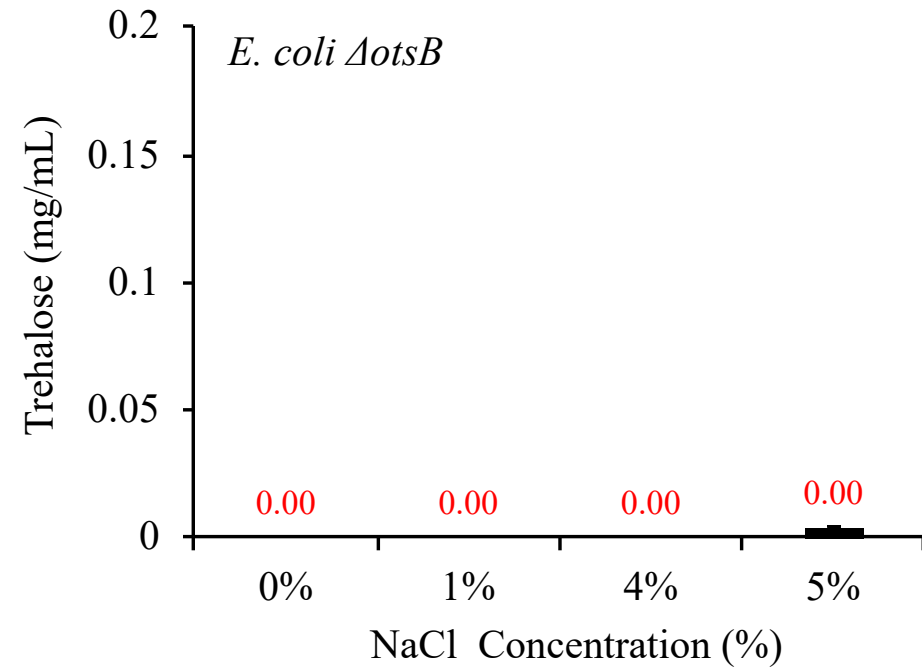

**Supplementary Figure 3** Quantification of trehalose accumulation in *E. coli* BW25113  $\Delta$ otsA and  $\Delta$ otsB. (A) *E. coli* BW25113  $\Delta$ otsA. (B) *E. coli* BW25113  $\Delta$ otsB. Three independent replicates were performed while the average values and standard error means were present.
